# Supplementary material for: Children in Greenland: disease patterns and contacts to the health care system
Source: PubMed Central journal article supplement (PMC5148806; doi:10.3402/ijch.v75.32903), 2016-12-08
Supplement: IJCH-75-32903-s001.pdf [file IJCH-75-32903-s001.pdf]

Supplementary tables

**Supplementary Table 1:** Frequency of hospital admissions among children.

| <b>Number of hospital admissions</b> | <b>Number of children</b> | <b>Percentage</b> |
|--------------------------------------|---------------------------|-------------------|
| 0                                    | 180                       | 57.9%             |
| 1                                    | 80                        | 25.7%             |
| 2                                    | 25                        | 8.0%              |
| 3                                    | 10                        | 3.2%              |
| 4                                    | 8                         | 2.6%              |
| 5                                    | 3                         | 1.0%              |
| 6                                    | 2                         | 0.6%              |
| 10                                   | 1                         | 0.3%              |
| 16                                   | 1                         | 0.3%              |
| 21                                   | 1                         | 0.3%              |
| <b>Total</b>                         | <b>311</b>                | <b>100.0%</b>     |

**Supplementary Table 2:** The five most frequent ICD-10 codes for hospital admissions for boys/girls and Nuuk/Iluissat.

| ICD-10 code                                                                       | N  | Mean (SD)    | Incidence rate (1000/year) |
|-----------------------------------------------------------------------------------|----|--------------|----------------------------|
| <b>Boys</b>                                                                       |    |              |                            |
| Observation for suspected disease or condition UNS (Z039)                         | 14 | 0.08 (±0.32) | 9.6                        |
| Pneumonia UNS (J189)                                                              | 12 | 0.07 (±0.32) | 8.3                        |
| Epilepsy UNS (G409)                                                               | 10 | 0.06 (±0.51) | 6.9                        |
| Febrile convulsions (R560)                                                        | 10 | 0.06 (±0.56) | 6.9                        |
| Acute bronchitis UNS (J209)                                                       | 10 | 0.06 (±0.29) | 6.9                        |
| <b>Girls</b>                                                                      |    |              |                            |
| Pneumonia UNS (J189)                                                              | 11 | 0.08 (±0.26) | 8.7                        |
| Observation for suspected disease or condition UNS (Z039)                         | 6  | 0.04 (±0.20) | 4.7                        |
| Febrile convulsions (R560)                                                        | 5  | 0.03 (±0.18) | 3.9                        |
| Acute bronchitis UNS (J209)                                                       | 5  | 0.03 (±0.18) | 3.9                        |
| Prematurity (P073)                                                                | 4  | 0.03 (±0.26) | 3.2                        |
| Fever UNS (R509)                                                                  | 4  | 0.03 (±0.16) | 3.2                        |
| <b>Nuuk</b>                                                                       |    |              |                            |
| Pneumonia UNS (J189)                                                              | 11 | 0.06 (±0.23) | 6.2                        |
| Observation for suspected disease or condition UNS (Z039)                         | 10 | 0.05 (±0.22) | 5.7                        |
| Unilateral or unspecified inguinal hernia, without obstruction or gangrene (K409) | 9  | 0.05 (±0.41) | 5.1                        |
| Concussion (S060)                                                                 | 8  | 0.04 (±0.20) | 4.5                        |
| Acute bronchitis UNS (J209)                                                       | 8  | 0.04 (±0.22) | 4.5                        |
| <b>Iluissat</b>                                                                   |    |              |                            |
| Pneumonia UNS (J189)                                                              | 12 | 0.11 (±0.39) | 12.5                       |
| Febrile convulsions (R560)                                                        | 11 | 0.10 (±0.68) | 11.4                       |
| Observation for suspected disease or condition UNS (Z039)                         | 10 | 0.09 (±0.34) | 10.4                       |
| Epilepsy UNS (G409)                                                               | 8  | 0.07 (±0.59) | 8.3                        |
| Follow-up examination after medical treatment (Z095)                              | 8  | 0.07 (±0.44) | 8.3                        |

*N*=number of contacts, *SD*=standard deviation.

**Supplementary Table 3:** The five most frequent ICD-10 categories for hospital admissions for boys/girls and Nuuk/Iluissat.

| ICD-10 category                                                                                     | N  | Mean (SD)    | Incidence rate (1000/ year) |
|-----------------------------------------------------------------------------------------------------|----|--------------|-----------------------------|
| <b>Boys</b>                                                                                         |    |              |                             |
| Diseases of the respiratory system [DJ00-DJ99]                                                      | 46 | 0.28 (±0.84) | 31.6                        |
| Symptoms, signs and abnormal clinical and laboratory findings, not elsewhere classified [DR00-DR99] | 29 | 0.18 (±0.98) | 19.9                        |
| Diseases of the ear and mastoid process [DH60-DH95]                                                 | 25 | 0.15 (±0.90) | 17.2                        |
| Factors influencing health status and contact with health services [DZ00-DZ99]                      | 25 | 0.15 (±0.54) | 17.2                        |
| Injury, poisoning and certain other consequences of external causes [DS00-DT98]                     | 25 | 0.15 (±0.39) | 17.2                        |
| <b>Girls</b>                                                                                        |    |              |                             |
| Diseases of the respiratory system [DJ00-DJ99]                                                      | 27 | 0.18 (±0.44) | 21.3                        |
| Symptoms, signs and abnormal clinical and laboratory findings, not elsewhere classified [DR00-DR99] | 16 | 0.11 (±0.44) | 12.6                        |
| Certain infectious and parasitic diseases [DA00-DB99]                                               | 12 | 0.08 (±0.32) | 9.5                         |
| Certain conditions originating in the perinatal period [DP00-DP96]                                  | 10 | 0.07 (±0.40) | 7.9                         |
| Diseases of the ear and mastoid process [DH60-DH95]                                                 | 10 | 0.07 (±0.36) | 7.9                         |
| <b>Nuuk</b>                                                                                         |    |              |                             |
| Diseases of the respiratory system [DJ00-DJ99]                                                      | 48 | 0.24 (±0.55) | 27.2                        |
| Injury, poisoning and certain other consequences of external causes [DS00-DT98]                     | 20 | 0.10 (±0.35) | 11.4                        |
| Diseases of the ear and mastoid process [DH60-DH95]                                                 | 20 | 0.10 (±0.39) | 11.4                        |
| Symptoms, signs and abnormal clinical and laboratory findings, not elsewhere classified [DR00-DR99] | 16 | 0.08 (±0.31) | 9.1                         |
| Diseases of the digestive system [DK00-DK93]                                                        | 16 | 0.08 (±0.47) | 9.1                         |
| <b>Iluissat</b>                                                                                     |    |              |                             |
| Symptoms, signs and abnormal clinical and laboratory findings, not elsewhere classified [DR00-DR99] | 29 | 0.26 (±1.22) | 30.1                        |
| Diseases of the respiratory system [DJ00-DJ99]                                                      | 25 | 0.22 (±0.86) | 26.0                        |
| Factors influencing health status and contact with health services [DZ00-DZ99]                      | 19 | 0.17 (±0.61) | 19.7                        |
| Diseases of the nervous system [DG00-DG99]                                                          | 18 | 0.16 (±1.03) | 18.7                        |
| Diseases of the ear and mastoid process [DH60-DH95]                                                 | 15 | 0.13 (±1.05) | 15.6                        |

*N*=number of contacts, *SD*=standard deviation.

**Supplementary Table 4:** The five most frequent ICD-10 codes for outpatient consultations for boys/girls and Nuuk/Iluissat.

| ICD-10 code                                           | N  | Mean (SD)    | Incidence rate (1000/year) |
|-------------------------------------------------------|----|--------------|----------------------------|
| <b>Male</b>                                           |    |              |                            |
| Otitis media UNS (H669)                               | 13 | 0.08 (±0.35) | 8.9                        |
| Hypertrophy of adenoids (J352)                        | 10 | 0.06 (±0.33) | 6.9                        |
| Hypermetropia (H520)                                  | 7  | 0.04 (±0.23) | 4.8                        |
| Hypertrophy of tonsils (J351)                         | 7  | 0.04 (±0.23) | 4.8                        |
| Special screening for respiratory tuberculosis (Z111) | 6  | 0.04 (±0.22) | 4.1                        |
| Delayed milestone (R620B)                             | 6  | 0.04 (±0.24) | 4.1                        |
| Epistaxis (R040)                                      | 6  | 0.04 (±0.22) | 4.1                        |
| Perforation of tympanic membrane UNS (H729)           | 6  | 0.04 (±0.19) | 4.1                        |
| <b>Female</b>                                         |    |              |                            |
| Special screening for respiratory tuberculosis (Z111) | 11 | 0.08 (±0.29) | 8.7                        |
| Hypermetropia (H520)                                  | 7  | 0.05 (±0.21) | 5.5                        |
| Astigmatism (H522)                                    | 6  | 0.04 (±0.20) | 4.7                        |
| Atopic dermatitis UNS (L209)                          | 5  | 0.03 (±0.18) | 3.9                        |
| Constipation (K590)                                   | 5  | 0.03 (±0.22) | 3.9                        |
| <b>Nuuk</b>                                           |    |              |                            |
| Special screening for respiratory tuberculosis (Z111) | 17 | 0.09 (±0.32) | 9.7                        |
| Otitis media UNS (H669)                               | 12 | 0.06 (±0.31) | 6.8                        |
| Hypertrophy of adenoids (J352)                        | 9  | 0.05 (±0.29) | 5.1                        |
| Hypertrophy of tonsils (J351)                         | 8  | 0.04 (±0.24) | 4.5                        |
| Constipation (K590)                                   | 7  | 0.04 (±0.21) | 4.0                        |
| <b>Iluissat</b>                                       |    |              |                            |
| Hypermetropia (H520)                                  | 8  | 0.07 (±0.29) | 8.3                        |
| Atopic dermatitis UNS (L209)                          | 6  | 0.05 (±0.23) | 6.2                        |
| Esotropia alternating (H500A)                         | 5  | 0.04 (±0.28) | 5.2                        |
| Hypertrophy of adenoids (J352)                        | 3  | 0.03 (±0.16) | 3.1                        |
| Perforation of tympanic membrane UNS (H729)           | 3  | 0.03 (±0.16) | 3.1                        |

*N*=number of contacts, *SD*=standard deviation.  
Z0-diagnoses excluded.

**Supplementary Table 5:** The five most frequent ICD-10 categories for outpatient consultations for boys/girls and Nuuk/Ilulissat.

| ICD-10 category                                                                                     | N  | Mean (SD)    | Incidence rate (1000/year) |
|-----------------------------------------------------------------------------------------------------|----|--------------|----------------------------|
| <b>Male</b>                                                                                         |    |              |                            |
| Diseases of the ear and mastoid process [DH60-DH95]                                                 | 35 | 0.21 (±0.67) | 24.1                       |
| Symptoms, signs and abnormal clinical and laboratory findings, not elsewhere classified [DR00-DR99] | 34 | 0.21 (±0.63) | 23.4                       |
| Diseases of the respiratory system [DJ00-DJ99]                                                      | 23 | 0.14 (±0.47) | 15.8                       |
| Diseases of the eye and adnexa [DH00-DH59]                                                          | 22 | 0.13 (±0.63) | 15.1                       |
| Congenital malformations, deformations and chromosomal abnormalities [DQ00-DQ99]                    | 13 | 0.08 (±0.40) | 8.9                        |
| <b>Female</b>                                                                                       |    |              |                            |
| Diseases of the eye and adnexa [DH00-DH59]                                                          | 32 | 0.22 (±0.68) | 25.2                       |
| Symptoms, signs and abnormal clinical and laboratory findings, not elsewhere classified [DR00-DR99] | 13 | 0.09 (±0.31) | 10.2                       |
| Diseases of the respiratory system [DJ00-DJ99]                                                      | 11 | 0.08 (±0.37) | 8.7                        |
| Congenital malformations, deformations and chromosomal abnormalities [DQ00-DQ99]                    | 9  | 0.06 (±0.34) | 7.1                        |
| Diseases of the skin and subcutaneous tissue [DL00-DL99]                                            | 8  | 0.05 (±0.23) | 6.3                        |
| <b>Nuuk</b>                                                                                         |    |              |                            |
| Symptoms, signs and abnormal clinical and laboratory findings, not elsewhere classified [DR00-DR99] | 40 | 0.20 (±0.60) | 22.7                       |
| Diseases of the eye and adnexa [DH00-DH59]                                                          | 32 | 0.16 (±0.56) | 18.2                       |
| Diseases of the ear and mastoid process [DH60-DH95]                                                 | 30 | 0.15 (±0.57) | 17.0                       |
| Diseases of the respiratory system [DJ00-DJ99]                                                      | 26 | 0.13 (±0.50) | 14.8                       |
| Congenital malformations, deformations and chromosomal abnormalities [DQ00-DQ99]                    | 15 | 0.08 (±0.39) | 8.5                        |
| <b>Ilulissat</b>                                                                                    |    |              |                            |
| Diseases of the eye and adnexa [DH00-DH59]                                                          | 22 | 0.19 (±0.79) | 22.9                       |
| Diseases of the ear and mastoid process [DH60-DH95]                                                 | 9  | 0.08 (±0.38) | 9.4                        |
| Diseases of the respiratory system [DJ00-DJ99]                                                      | 8  | 0.07 (±0.26) | 8.3                        |
| Congenital malformations, deformations and chromosomal abnormalities [DQ00-DQ99]                    | 7  | 0.06 (±0.34) | 7.3                        |
| Mental and behavioural disorders [DF00-DF99]                                                        | 7  | 0.06 (±0.34) | 7.3                        |
| Symptoms, signs and abnormal clinical and laboratory findings, not elsewhere classified [DR00-DR99] | 7  | 0.06 (±0.28) | 7.3                        |

*N*=number of contacts, *SD*=standard deviation.  
Z-diagnoses excluded.

**Supplementary Table 6:** The five most frequent ICD-10 codes for contacts to the primary health care sector for boys/girls and Nuuk/Ilulissat.

| ICD-10 code                      | N  | Mean (SD)           | Incidence rate (1000/year) |
|----------------------------------|----|---------------------|----------------------------|
| <b>Male</b>                      |    |                     |                            |
| Conjunctivitis UNS (H109)        | 41 | 1.71 ( $\pm 2.07$ ) | 197.4                      |
| Otitis media UNS (H669)          | 40 | 1.67 ( $\pm 2.32$ ) | 192.6                      |
| Acute nasopharyngitis UNS (J009) | 36 | 1.50 ( $\pm 1.89$ ) | 173.3                      |
| Cough UNS (R059)                 | 30 | 1.25 ( $\pm 1.39$ ) | 144.4                      |
| Rash UNS (R219)                  | 29 | 1.21 ( $\pm 1.14$ ) | 139.6                      |
| <b>Female</b>                    |    |                     |                            |
| Conjunctivitis UNS (H109)        | 51 | 1.82 ( $\pm 2.40$ ) | 220.6                      |
| Acute nasopharyngitis UNS (J009) | 51 | 1.82 ( $\pm 1.83$ ) | 220.6                      |
| Rash UNS (R219)                  | 45 | 1.61 ( $\pm 2.01$ ) | 194.6                      |
| Fever UNS (R509)                 | 39 | 1.39 ( $\pm 1.85$ ) | 168.7                      |
| Cough UNS (R059)                 | 38 | 1.36 ( $\pm 1.37$ ) | 164.3                      |
| <b>Nuuk</b>                      |    |                     |                            |
| Acute nasopharyngitis UNS (J009) | 79 | 1.98 ( $\pm 1.98$ ) | 234.4                      |
| Conjunctivitis UNS (H109)        | 77 | 1.93 ( $\pm 2.44$ ) | 228.5                      |
| Cough UNS (R059)                 | 65 | 1.63 ( $\pm 1.39$ ) | 192.9                      |
| Otitis media UNS (H669)          | 60 | 1.50 ( $\pm 1.81$ ) | 178.0                      |
| Rash UNS (R219)                  | 58 | 1.45 ( $\pm 1.74$ ) | 172.1                      |
| <b>Ilulissat</b>                 |    |                     |                            |
| Fever UNS (R509)                 | 17 | 1.42 ( $\pm 1.51$ ) | 166.8                      |
| Rash UNS (R219)                  | 16 | 1.33 ( $\pm 1.44$ ) | 157.0                      |
| Conjunctivitis UNS (H109)        | 15 | 1.25 ( $\pm 1.29$ ) | 147.2                      |
| Otitis media UNS (H669)          | 13 | 1.08 ( $\pm 1.68$ ) | 127.6                      |
| Otalgia (H920)                   | 10 | 0.83 ( $\pm 1.34$ ) | 98.1                       |

*N*=number of contacts, *SD*=standard deviation. Study population = 52.  
Z0-diagnoses and vaccinations excluded.

**Supplementary Table 7:** The five most frequent ICD-10 categories for contacts to the primary health care sector for boys/girls and Nuuk/Ilulissat.

| ICD-10 category                                                                                     | N   | Mean (SD)    | Incidence rate (1000/year) |
|-----------------------------------------------------------------------------------------------------|-----|--------------|----------------------------|
| <b>Male</b>                                                                                         |     |              |                            |
| Symptoms, signs and abnormal clinical and laboratory findings, not elsewhere classified [DR00-DR99] | 125 | 5.21 (±3.20) | 601.8                      |
| Diseases of the respiratory system [DJ00-DJ99]                                                      | 119 | 4.96 (±4.21) | 572.9                      |
| Diseases of the ear and mastoid process [DH60-DH95]                                                 | 78  | 3.25 (±3.31) | 375.5                      |
| Certain infectious and parasitic diseases [DA00-DB99]                                               | 68  | 2.83 (±2.46) | 327.4                      |
| Injury, poisoning and certain other consequences of external causes [DS00-DT98]                     | 53  | 2.21 (±1.38) | 255.2                      |
| <b>Female</b>                                                                                       |     |              |                            |
| Symptoms, signs and abnormal clinical and laboratory findings, not elsewhere classified [DR00-DR99] | 153 | 5.46 (±3.61) | 661.7                      |
| Diseases of the respiratory system [DJ00-DJ99]                                                      | 139 | 4.96 (±3.46) | 601.1                      |
| Certain infectious and parasitic diseases [DA00-DB99]                                               | 75  | 2.68 (±2.28) | 324.4                      |
| Diseases of the ear and mastoid process [DH60-DH95]                                                 | 71  | 2.54 (±1.90) | 307.1                      |
| Diseases of the skin and subcutaneous tissue [DL00-DL99]                                            | 59  | 2.11 (±2.03) | 255.2                      |
| <b>Nuuk</b>                                                                                         |     |              |                            |
| Diseases of the respiratory system [DJ00-DJ99]                                                      | 223 | 5.58 (±3.90) | 661.7                      |
| Symptoms, signs and abnormal clinical and laboratory findings, not elsewhere classified [DR00-DR99] | 216 | 5.40 (±3.54) | 640.9                      |
| Diseases of the ear and mastoid process [DH60-DH95]                                                 | 115 | 2.88 (±2.59) | 341.2                      |
| Certain infectious and parasitic diseases [DA00-DB99]                                               | 115 | 2.88 (±2.37) | 341.2                      |
| Diseases of the eye and adnexa [DH00-DH59]                                                          | 87  | 2.18 (±2.47) | 258.1                      |
| <b>Ilulissat</b>                                                                                    |     |              |                            |
| Symptoms, signs and abnormal clinical and laboratory findings, not elsewhere classified [DR00-DR99] | 62  | 5.17 (±2.98) | 608.4                      |
| Diseases of the respiratory system [DJ00-DJ99]                                                      | 35  | 2.92 (±2.58) | 343.5                      |
| Diseases of the ear and mastoid process [DH60-DH95]                                                 | 34  | 2.83 (±2.92) | 333.7                      |
| Certain infectious and parasitic diseases [DA00-DB99]                                               | 28  | 2.33 (±2.31) | 274.8                      |
| Diseases of the skin and subcutaneous tissue [DL00-DL99]                                            | 20  | 1.67 (±1.88) | 196.3                      |
| Injury, poisoning and certain other consequences of external causes [DS00-DT98]                     | 20  | 1.67 (±1.07) | 196.3                      |

*N*=number of contacts, *SD*=standard deviation. Study population = 52.

Z-diagnoses excluded.
